# Vitamin D deficiency and disease risk among aboriginal Arctic populations

Sangita Sharma, Alison B Barr, Helen M Macdonald, Tony Sheehy, Rachel Novotny, and Andre Corriveau

*Aboriginal populations living above the Arctic Circle are at particularly high risk of vitamin D deficiency due to limited ultraviolet B exposure (related to geographic latitude) and inadequate dietary intake (recently related to decreased traditional food consumption). Major changes in diet and lifestyle over the past 50 years in these populations have coincided with increased prevalence rates of rickets, cancer, diabetes, and obesity, each of which may be associated with vitamin D inadequacy. This review examines the risk factors for vitamin D inadequacy, the associations between vitamin D and disease risk at high geographic latitudes, and the recommendations for improving vitamin D status particularly among aboriginal Arctic populations. Traditional foods, such as fatty fish and marine mammals, are rich sources of vitamin D and should continue to be promoted to improve dietary vitamin D intake. Supplementation protocols may also be necessary to ensure adequate vitamin D status in the Arctic.*

© 2011 International Life Sciences Institute

## INTRODUCTION

It is currently estimated that 1 billion people worldwide are vitamin D deficient<sup>1</sup> despite vitamin D food fortification in some countries, national dietary intake recommendations for deficiency prevention, and adequate solar ultraviolet B (UVB) in many countries. Breastfed infants, the elderly, those with limited solar UVB exposure (due to protective clothing, high geographic latitude, or insufficient time spent outdoors, for example), and those with dark skin pigmentation are groups believed to be at highest risk of deficiency.<sup>2–4</sup> Although it has long been known that vitamin D deficiency causes rickets and osteomalacia, emerging evidence has implicated hypovitaminosis D [the definition of which is hotly debated, but generally referred to as serum 25(OH)D concentrations

<75 nmol/L] in a growing list of nonskeletal chronic diseases that includes several types of cancer, type 1 and type 2 diabetes, obesity, cardiovascular disease, multiple sclerosis, and infectious diseases (such as tuberculosis).<sup>1,4,5</sup> As the relationships between vitamin D and these chronic diseases become clearer, there is increased concern for accurate clinical assessment of vitamin D status, definitions of optimal serum concentrations, revised intake recommendations, and effective strategies to prevent deficiency.<sup>1,6</sup>

Serum 25-hydroxyvitamin D [25(OH)D], or calcidiol, is the principal circulating vitamin D metabolite and the most common measurement of vitamin D status. Although no formal definitions currently exist, most experts define vitamin D deficiency as serum 25(OH)D levels <20–25 nmol/L<sup>7</sup>; however, <50 nmol/L is

Affiliations: *S Sharma* is with the Department of Medicine, University of Alberta, Edmonton, Alberta, Canada. *AB Barr* is with the Nutrition Research Institute, University of North Carolina at Chapel Hill, Kannapolis, North Carolina, USA. *HM Macdonald* is with the Bone and Musculoskeletal Research Programme, University of Aberdeen, Foresterhill, Aberdeen, Scotland. *T Sheehy* is with the School of Food and Nutritional Sciences, University College Cork, Cork, Republic of Ireland. *R Novotny* is with the Department of Human Nutrition, Food and Animal Sciences, University of Hawaii at Manoa, Honolulu, Hawaii, USA. *A Corriveau* is with Alberta Health and Wellness, Government of Alberta, Edmonton, Alberta, Canada.

Correspondence: *S Sharma*, Endowed Chair in Aboriginal Health, Professor of Aboriginal and Global Health, Department of Medicine, University of Alberta, 1-126 Li Ka Shing Centre for Health Research Innovation, Edmonton, AB T6G 2E1, Canada. E-mail: gita.sharma@ualberta.ca, Phone: +1-780-248-1393; Fax: +1-780-248-1611.

Key words: Arctic, aboriginal populations, chronic disease, vitamin D

**Table 1 Informal definitions of deficient, insufficient, and optimal serum 25(OH)D concentrations.**

|               | Range of serum 25(OH)D                          | Source                                                                                                                          |
|---------------|-------------------------------------------------|---------------------------------------------------------------------------------------------------------------------------------|
| Deficiency    | <20–25 nmol/L                                   | Hanley and Davison (2005) <sup>7</sup>                                                                                          |
| Insufficiency | 50–80 nmol/L                                    | Hanley and Davison (2005) <sup>7</sup> ; Holick (2008) <sup>8</sup>                                                             |
| Optimal       | >75 nmol/L,<br>90–100 nmol/L,<br>100–150 nmol/L | Garland et al. (2009) <sup>10</sup> ;<br>Bischoff-Ferrari et al. (2006) <sup>9</sup> ;<br>Whiting and Calvo (2005) <sup>6</sup> |

Units of nmol/L can be converted to ng/mL by dividing by 2.496.

sometimes defined as deficient (Table 1).<sup>8</sup> The appropriate definition for insufficiency is more controversial; it is often defined as serum levels of 50–80 nmol/L,<sup>7,8</sup> although some studies use lower values. Most evidence suggests better health outcomes are achieved with concentrations >75 nmol/L, while the most optimal range may be 90–100 nmol/L or even 100–150 nmol/L.<sup>6,9,10</sup> It should be noted that some studies report serum concentrations in international system (SI) units, as nmol/L, while others report values as ng/mL (1 ng/mL = 2.496 nmol/L); all values are reported as nmol/L in this review. Assay methods to measure serum 25(OH)D also vary among studies.

The Arctic Circle, located at approximately 66° 33' N latitude, runs through the northernmost areas of Canada, Denmark (i.e., Greenland), Iceland, Norway, Sweden, Finland, Russia, and the United States (i.e., Alaska). The land within the Arctic Circle is often referred to as the “land of the midnight sun” because the sun does not set for approximately 3 months during the summer. As autumn approaches, the amount of daylight decreases steadily until the sun is no longer visible for up to 2 months in the winter, a phenomenon referred to as “polar night” or “polar twilight.” However, any time the sun is present at these latitudes, the solar zenith angle is such that it causes significantly less UVB radiation to reach the earth’s surface.<sup>11</sup> Because solar UVB exposure is considered the principal source of vitamin D, the latitude and, thereby, limited UVB exposure in this region of the world play a critical role in the vitamin D status of its inhabitants.

The Arctic is inhabited by approximately 4 million people, approximately 10% of whom are aboriginal people, including (but not limited to) Inuit, Inuvialuit, First Nations, Metis, Yup’ik, Aleut, and Saami.<sup>12</sup> According to the Arctic Human Development Report published in 2004, aboriginal populations range from approximately 88% in Greenland, 51% in Arctic Canada, 16% in Alaska, 5% in Arctic Norway, Sweden, and Finland, to less than 4% in Arctic Russia.<sup>13</sup> Over the past 50 years, aboriginal Arctic populations have experienced a rapid transition in diet and lifestyle, largely a result of increased acculturation.<sup>13</sup> Particularly, the diet within this population has changed from one based primarily on traditional foods, including caribou, fish, and marine mammals, to a diet

consisting mainly of imported non-nutrient-dense foods due to acculturation and, possibly, climate change.<sup>14–16</sup> As a result, widespread dietary inadequacy has become evident, and chronic disease rates are rising among these populations.<sup>15–19</sup>

This review aims to examine the risk factors for vitamin D deficiency and the associations between vitamin D and chronic and infectious diseases among aboriginal populations in the Arctic. Relevant research conducted at northern geographic latitudes (primarily  $\geq 55^\circ$ ), including Norway, Greenland, Finland, Denmark, Estonia, the United Kingdom, and Canada, was reviewed. Key words used for the literature search included the following: vitamin D, Arctic, aboriginal, latitude, UVB, traditional foods, dietary intake, bone, cancer, obesity, diabetes, and infectious disease. The data gathered may be useful in making important decisions for an intervention to improve vitamin D intake and status among aboriginal Arctic populations.

## RISK FACTORS FOR ABORIGINAL ARCTIC POPULATIONS

### Latitude, season, and sunlight exposure

Upon solar UVB exposure, vitamin D is synthesized in the skin; therefore, geographic latitude and season are critical factors to consider when assessing vitamin D status. It has long been recognized that vitamin D cannot be produced in the skin at latitudes as low as 42° N from November through February due to the increased angle of the sun during these winter months, which decreases the intensity of UVB radiation.<sup>11</sup> As latitude increases, so does the length of the year during which cutaneous vitamin D production is impossible.<sup>11</sup> It is also believed that during summer months, those living at higher latitudes (particularly >60° N) require much longer UVB exposure times than those living at lower latitudes to cutaneously synthesize equivalent amounts of vitamin D.<sup>20</sup> Figure 1 illustrates Webb’s<sup>20</sup> model of the effect of latitude on the ability to synthesize vitamin D throughout the year. There are a set of assumptions made in this model (including fixed atmospheric conditions, horizontal skin surface, and skin type), which are further described in the original paper.<sup>20</sup> Dowdy et al.<sup>21</sup> suggest

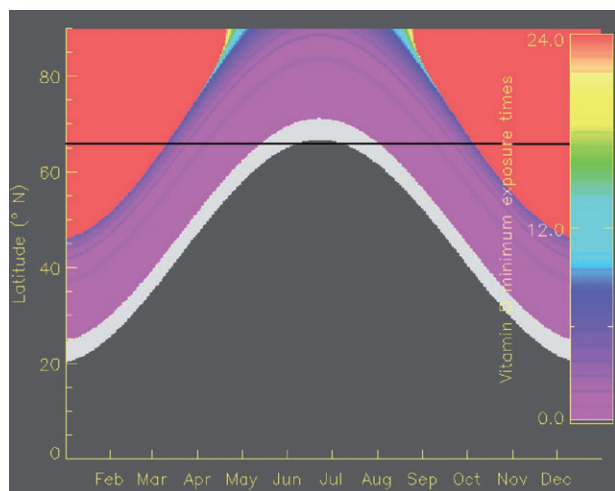

**Figure 1 Minimum exposure time (hours) needed to synthesize the equivalent of 1,000 IU (25 µg) vitamin D with respect to latitude and time of year (assuming a fixed atmospheric state and a horizontal skin surface).** The red areas show where vitamin D synthesis is not possible. The black areas show where vitamin D synthesis occurs in minutes (rather than hours). The horizontal black line at approximately 66 degrees was added to represent the latitude of the Arctic Circle for the purposes of this review. Reproduced from Webb (2006)<sup>20</sup> with permission from Elsevier.

this model overestimates required exposure times; however, the fact remains that exposure times needed to synthesize a beneficial amount of vitamin D (when cutaneous synthesis is possible) are sometimes impractical for those living at high latitudes.

Several studies conducted at northern latitudes have confirmed inadequate vitamin D status in both winter and summer seasons. In Estonia, a northern European country located at latitude 57–59° N, vitamin D insufficiency [serum 25(OH)D <50 nmol/L] varied by season and was widespread among the study population ( $n = 367$ ).<sup>22</sup> In winter, the mean serum 25(OH)D concentration was  $43.7 \pm 15$  nmol/L, with 73% of the population having insufficient levels and 8% being deficient (<25 nmol/L). In summer, the mean serum 25(OH)D concentration was  $59.3 \pm 18$  nmol/L; 29% had insufficient levels and less than 1% were deficient. Those who used vitamin D supplements (2%) (5–20 µg of vitamin D per day) had higher 25(OH)D levels in the winter than those who did not take supplements. Additionally, body mass index (BMI) and age were significantly associated with vitamin D status; however, sunbathing habits (i.e., how much of the body was regularly exposed to sun) explained much of the variance caused by these factors. Men had a greater increase in 25(OH)D concentrations after the summer and a lower mean 25(OH)D concentration in the winter

compared to women. It should be noted that in Estonia, dairy products are not fortified with vitamin D, few people use supplements, and the typical diet does not contain vitamin-D-rich foods; therefore, this population depends heavily on sunlight exposure for vitamin D. This study concludes that summertime build-up of vitamin D is not adequate to achieve optimal vitamin D status throughout the year at northern latitudes.<sup>22</sup>

Macdonald et al.<sup>23</sup> assessed 25(OH)D status in relation to sunlight exposure, dietary vitamin D intake, bone health, and overweight in 3,113 postmenopausal women living at latitude 57° N in the UK (Aberdeen, Scotland). Mean 25(OH)D concentrations were higher in summer and fall due to greater sunlight exposure compared to winter and spring. However, during each season, between 73% and 84% of the study population had serum 25(OH)D levels of <70 nmol/L, which was considered insufficient. Total dietary vitamin D intake (from food, cod liver oil, and multivitamins) was significantly associated with 25(OH)D concentrations throughout the year. These results suggest dietary intake, especially in the winter and spring, when sunlight is insufficient for cutaneous vitamin D production, can help prevent seasonal variations in vitamin D status in populations living at higher latitudes. Low 25(OH)D was also associated with increased bone loss and turnover as well as with obesity.<sup>23</sup>

In the Norwegian Arctic (latitude 65–71° N), vitamin D status of middle-aged women ( $n = 443$ ) was significantly associated with the time of year and UVB exposure.<sup>24</sup> Between the months of November and June, more women had a serum concentration below 37.5 nmol/L (23%) and below 50 nmol/L (58%) in January and February. Women who spent time in southern latitudes during the summer before their blood was sampled and those who used solariums (tanning beds) had higher serum 25(OH)D concentrations than those who stayed in Norway the entire year. In fact, staying in the Arctic regions of Norway during the summer prior to blood sampling was significantly negatively associated with 25(OH)D concentration. Dietary vitamin D intake also predicted serum 25(OH)D concentrations in this study, emphasizing that traditional marine foods (particularly fish, fish liver, and fish liver oil) can contribute significantly to vitamin D intake in Arctic populations.<sup>24</sup>

For more than half of the year, Arctic populations experience extremely low, if any, UVB radiation, due to the geographic latitude. During this time, residents must wear protective, cold-weather clothing that covers the skin, and they spend less time outdoors due to the extreme temperatures. In the three above-mentioned studies, vitamin D insufficiency was also seen during the summer at high latitudes.<sup>22–24</sup> Research is needed to evaluate the amount of summer sun exposure and summertime vitamin D status in populations living above

the Arctic Circle. As long as UVB radiation is inadequate to produce vitamin D cutaneously, these populations are completely dependent on dietary sources from food and/or supplements.

### Dietary intake and nutrition transition

The diet and lifestyle transition among Arctic populations has had deleterious effects on diet quality. Recent research by Sharma et al.<sup>15,16</sup> conducted among Inuit and Inuvialuit populations living in Nunavut ( $n = 87$ ) and the Northwest Territories (NWT), Canada ( $n = 101$ ), respectively, found that dietary vitamin D intake was less than the 2010 Dietary Reference Intakes (DRIs).<sup>25</sup> A comprehensive dietary analysis was completed using a validated, culturally appropriate quantitative food frequency questionnaire.<sup>26,27</sup> In Nunavut, the mean daily intake of vitamin D among those aged 19–88 years was 2.25  $\mu\text{g}$  for men and 2.13  $\mu\text{g}$  for women.<sup>15</sup> This is less than a quarter of the current recommended dietary allowance (RDA) for vitamin D in the United States and Canada: 15  $\mu\text{g}/\text{day}$  (500 IU) for adults up to 70 years; 20  $\mu\text{g}/\text{day}$  (800 IU) for adults >70 years.<sup>25</sup> In the NWT, 83–100% of all age and gender groups did not meet the vitamin D recommendations, with the exception of men between the ages of 51 and 70 years; in this group, 63% did not meet the recommendation.<sup>16</sup> Women in the NWT had a lower mean daily intake of vitamin D than men, 1.9  $\mu\text{g}$  and 6.4  $\mu\text{g}$ , respectively. Further dietary analysis in the same populations confirmed inadequate dietary intake of vitamin D. Among 75 Inuit men and women in Nunavut, more than 60% had low vitamin D intake, with mean daily intakes of 1.9  $\mu\text{g}$  and 3.1  $\mu\text{g}$ , respectively.<sup>28</sup> In the NWT, 84–100% of 64 Inuvialuit women were found to have lower-than-recommended intakes (mean 3.0  $\mu\text{g}/\text{day}$ ), while most men met the recommendation (mean 7.7  $\mu\text{g}/\text{day}$ ).<sup>29</sup> It should be noted that some studies report vitamin D intake in international units (IU), while others report vitamin D intake in micrograms ( $\mu\text{g}$ ) (1  $\mu\text{g} = 40$  IU); all intake values in this review are reported in micrograms.

Conversely, adequate vitamin D intake was reported among Canadian aboriginal and white women ( $n = 356$ ) living in Manitoba (49°–58° N); total mean daily intake from food and supplements was 8.6–18.8  $\mu\text{g}/\text{day}$ .<sup>30</sup> Rural aboriginal women obtained significantly more vitamin D from food than urban aboriginal and urban white women, who also used supplements, and older women ( $\geq 51$  years) consumed more vitamin-D-rich foods than younger women. Despite adequate intake, the prevalence of vitamin D deficiency was higher among Canadian aboriginal women than among Canadian white women. Thirty-two percent of rural aboriginal and 30.4% of urban aboriginal women, compared to 18.6% of urban white women, had a serum 25(OH)D concentration of

<37.5 nmol/L, which met the definition of deficiency in this study; 84–95% of aboriginal women and 62% of white women had levels below the optimal level of 75 nmol/L. Vitamin D intake was significantly correlated with vitamin D status only in white women, and the authors indicated this was likely not due to the season in which blood was sampled. Interestingly, fortified milk and margarine were the main sources of vitamin D among these women, which underscores the impact of food fortification in Canada.<sup>30</sup>

It is believed that vitamin D was consumed in adequate amounts in the traditional Inuit diet due to more frequent consumption of vitamin-D-rich foods, such as fatty fish, marine mammals, liver, and other organ meats.<sup>14,18</sup> However, in four recent studies there were no traditional foods (TF) among the top ten foods most frequently consumed in both Nunavut and the NWT, leading researchers to suggest that decreased consumption of TF is likely contributing to current inadequate intake of vitamin D.<sup>15,16,28,29</sup> Receveur et al.<sup>14</sup> also reported decreasing consumption of TF in the Canadian Arctic. Nonetheless, TF (including fatty fish, seal, and whale) still contributed significantly to vitamin D intake: 26.8% in the NWT and 57.7% in Nunavut; therefore, the authors suggested these foods should be promoted to help improve dietary adequacy.<sup>28,29</sup>

Kuhnlein et al.<sup>18,31</sup> evaluated the impact of TF consumption on nutrient intake in Yukon First Nations, Dene/Me'tis, and Inuit adults ( $n = 3,404$ ) and in Yukon and Dene children ( $n = 98$ ) residing in Yukon, the NWT, Nunavut, and Labrador. Twenty-four-hour recalls were collected during two seasons to estimate mean vitamin D intake for each group. When a minimum of one TF was consumed in a day, vitamin D intake (and many other nutrients) was significantly higher in all adults. Mean vitamin D intake was three times higher among Inuit (25.1  $\mu\text{g}/\text{day}$ ) than among Yukon First Nations and Dene/Metis populations (7.3  $\mu\text{g}/\text{day}$  and 7.9  $\mu\text{g}/\text{day}$ , respectively) when TF were consumed. Older adults (>40 years) in all groups consumed significantly more TF than younger adults, and older Inuit ( $\geq 61$  years) consumed the most TF of any group.<sup>18,31</sup>

Rejnmark et al.<sup>32</sup> measured various plasma indicators of calcium homeostasis and bone metabolism in Inuit Greenlanders and Danes ( $n = 188$ ) consuming a traditional Inuit diet (defined as including seal and/or whale at least once a week) or a Westernized diet (defined as including seal and/or whale 3 times or less per month) and living in Greenland (at 64° N), and Denmark (55° N). These data showed decreased vitamin D plasma concentrations related to a diet that included less TF. Inuit Greenlanders consuming a traditional diet had higher 25(OH)D concentrations (53 nmol/L) than the other Inuit groups living in either Greenland or Denmark

**Table 2 Dietary vitamin D intake among aboriginal Canadian populations.**

| Author (year)                        | Population                                   | Reported mean daily vitamin D intake <sup>†</sup>                  |
|--------------------------------------|----------------------------------------------|--------------------------------------------------------------------|
| Sharma et al. (2010) <sup>16</sup>   | Inuit adults (in Nunavut)                    | 2.3 µg for men<br>2.1 µg for women                                 |
|                                      | Inuvialuit adults (in NWT)                   | 6.4 µg for men<br>1.9 µg for women                                 |
| Hopping et al. (2010) <sup>28</sup>  | Inuit adults (in Nunavut)                    | 1.9 µg for men<br>3.2 µg for women                                 |
| Erber et al. (2010) <sup>29</sup>    | Inuvialuit adults (in NWT)                   | 7.7 µg for men<br>3.0 µg for women                                 |
| Kuhnlein et al. (2004) <sup>18</sup> | First Nations adults (in Yukon)              | 7.3 µg with traditional foods<br>2.1 µg without traditional foods  |
|                                      | Dene/Metis adults (in NWT)                   | 7.9 µg with traditional foods<br>3.5 µg without traditional foods  |
|                                      | Inuit adults (in NWT, Nunavut, and Labrador) | 25.1 µg with traditional foods<br>8.6 µg without traditional foods |
| Weiler et al.(2004) <sup>30</sup>    | Rural aboriginal women (in Manitoba)         | 13.9 µg from food<br>13.9 µg from food + supplements               |
|                                      | Urban aboriginal women (in Manitoba)         | 7.8 µg from food<br>10.8 µg from food + supplements                |
|                                      | Urban white women (in Manitoba)              | 6.0 µg from food<br>10.6 µg from food + supplements                |

<sup>†</sup> 1 µg = 40 IU.

Abbreviation: NWT, Northwest Territories.

and consuming a Westernized diet (32 nmol/L and 44 nmol/L, respectively). In addition to diet, this study found ethnicity, age, and season were also significant independent determinants of vitamin D status, while latitude was not. This study suggests ethnicity should be considered in future research of similar populations, as genetic differences in calcium and vitamin D metabolism may exist between Inuits and Caucasians.<sup>32</sup>

In contrast, a recent study that investigated vitamin D status and its determinants among elderly subjects ( $n = 669$ ) in the Faroe Islands (latitude 62° N) indicated that high intake of marine foods may not be enough to protect high-latitude populations from vitamin D inadequacy.<sup>33</sup> The subjects were from a fishing population that regularly consumes fish and pilot whale blubber; since vitamin D fortification is not mandated, these food items comprise their primary source of vitamin D. However, approximately 54% of the study population had serum 25(OH)D levels <50 nmol/L, while only 10.3% had serum 25(OH)D levels >80 nmol/L, with median values being higher in the summer than in the winter. Overall fish intake was not significantly correlated with vitamin D status; however, the most frequently consumed fish were cod and haddock, which are not as high in vitamin D as more fatty fish. Whale blubber intake, at least once a month, increased the odds of 25(OH)D levels being above 80 nmol/L by 56%. BMI, female gender, and summer season were also positively associated with higher vitamin D status. Finally, these authors raised the concern that a traditional diet also increases exposure to environmental

contaminants (e.g., methylmercury) and suggest that supplementation is warranted in this population.<sup>33</sup>

Further investigation of possible genetic differences in vitamin D metabolism will provide valuable data to help determine appropriate dietary approaches to preventing vitamin D inadequacy. Evidence of dietary vitamin D intake among aboriginal Arctic populations is summarized in Table 2.

## VITAMIN D AND DISEASE

### Bone health

Recognized in 1645, rickets was the first observed health effect of vitamin D deficiency.<sup>34</sup> Since food (and infant formula) fortification, sunlight exposure, and supplementation were identified as appropriate treatments for rickets, the focus on vitamin D subsided. However, the persistence or re-emergence of rickets in children and osteomalacia in adults, along with more recent associations between vitamin D and bone health, has placed vitamin D back in the spotlight in recent years.

Vitamin D deficiency rickets continues to be reported among children throughout the world, including the United States, Canada, and the United Kingdom.<sup>35,36</sup> In Canada, Ward et al.<sup>36</sup> confirmed 104 cases of rickets in children between 2002 and 2004, reporting an overall annual incidence of 2.9 cases per 100,000. The incidence was greater among children over 1 year of age

living in the North (Yukon Territory, the NWT, and Nunavut). By ethnicity, 13% of the children were First Nations and 12% were Inuit. Overall, 89% of the children were classified as having intermediate or darker skin, and 94% were breastfed. Maternal factors were low sun exposure and low intake of vitamin D (from diet or supplements) during pregnancy and lactation. This study highlighted the need for increased attention to maternal and infant vitamin D status, particularly in people with darker skin and in aboriginal women and children living in Canada's northern territories.<sup>36</sup> The Canadian Paediatric Society acknowledges the health issues related to vitamin D status in mothers and children and has confirmed that deficiency is especially common among aboriginal people, many of whom live in the Arctic. A position statement on the topic recommends routine vitamin D supplementation for children and pregnant and lactating women living in the northern regions of Canada.<sup>37</sup>

Although there is limited evidence, it has been reported that aboriginal people may have significantly higher rates of fracture than non-aboriginal people.<sup>38</sup> A study of the First Nations population in Manitoba (latitude 49–58° N) evaluated risk of all fractures and found that First Nations people had a twofold higher incidence of any type of fracture than non-First-Nations people. Vitamin D status and intake were not assessed; however, this study was the first to identify this population as being at higher risk for fracture, suggesting that ethnicity and/or higher prevalence of osteoporosis may be factors in fracture rates in this population.<sup>38</sup>

Low vitamin D status is associated with elevated parathyroid hormone, which is associated with increased bone loss and turnover. In southern Finland (latitude 60° N), the relationships between intact parathyroid hormone (iPTH), serum 25(OH)D, and bone health in young healthy adults aged 31–43 years were assessed.<sup>39</sup> This study reported that one-third of the study population ( $n = 328$ ) was vitamin D deficient [25(OH)D < 25 nmol/L] during the winter despite adequate mean daily vitamin D intake by men and nearly adequate intake by women. Serum iPTH concentrations were found to increase with 25(OH)D levels < 80 nmol/L in women and < 40 nmol/L in men; moreover, women had significantly higher iPTH concentrations than men. Significantly lower forearm bone mineral density was seen only in men with higher iPTH concentrations, and no relationship was found between 25(OH)D levels and bone mineral density.<sup>39</sup> Thus, current dietary intake recommendations may not be adequate for healthy young adults at higher latitudes to achieve the optimal vitamin D status needed to maintain normal iPTH concentrations in the wintertime and to prevent decreased bone mineral density.

Vitamin D and calcium supplementation during winter may prevent seasonal changes in vitamin D status and bone loss in some populations<sup>40</sup>; however, there is no consensus on the optimal level or duration of supplementation or on whether supplementation is most effective with calcium alone or in combination with vitamin D for bone health. Several drug therapies also show good efficacy for improving bone density,<sup>41</sup> but the focus of this review is dietary strategies for improving vitamin D status at high latitudes.

## Cancer

It is believed the incidence of malignant diseases, including cancer, was exceptionally low among Inuit populations historically, but this is no longer the case.<sup>13</sup> Coinciding with major changes in diet and lifestyle over the past 50 years, a significantly increased incidence of cancer, especially lung, colorectal, breast, and stomach cancer, has been observed among the Inuit.<sup>13</sup> The incidence of colorectal cancer is currently higher in Alaskan Inuit than in whites living in the United States.<sup>13</sup> Furthermore, cancer is now the leading cause of death among Alaska Native people, and cancer mortality rates in Alaska are significantly higher than those in the mainland United States.<sup>42</sup> While environmental, geographical, and genetic factors are important to consider, poor diet quality and lifestyle changes are also plausible contributors to these numbers.

A link between sun exposure, latitude, and cancer mortality was first suggested in 1915.<sup>43</sup> What is referred to as the UVB/vitamin D/cancer theory was proposed in 1980 by Garland and Garland on the basis of an observation that colon cancer rates were lowest in the sunniest parts of the United States,<sup>44</sup> and support for this theory has grown to be scientifically strong enough that vitamin D is currently used in cancer prevention and treatment.<sup>45</sup> To date, evidence has linked UVB exposure with the incidence of approximately 18 types of cancer, including colon, breast, lung, stomach, and prostate cancer.<sup>45–47</sup> Specifically, age-adjusted incidence of breast cancer was higher in countries at higher latitudes (including Iceland and Norway) when incidence rates in 107 countries were compared,<sup>46</sup> while the age-adjusted incidence of lung cancer was also higher in countries at higher latitudes (including Canada, Denmark, and the United Kingdom) in a comparison of incidence in 111 countries.<sup>47</sup> A recent meta-analysis of 63 observational studies that examined vitamin D and cancer risk found that the majority of these studies reported a positive effect of sufficient (>75 nmol/L) vitamin D status on the risk of colon, breast, prostate, and ovarian cancer.<sup>48</sup> Several large epidemiological studies linked lower dietary vitamin D intake with higher risk of colon cancer<sup>48</sup>; lower dietary vitamin

D intake has also been associated with breast cancer.<sup>46</sup> At high latitudes, survival rates of several types of cancer have been associated with season of diagnosis as a result of seasonal variations in UVB irradiance and vitamin D status. In Norway (latitude 58–71° N), Robsahm et al.<sup>49</sup> found a significant variation in prognosis based on the season of diagnosis in 115,096 breast, colon, and prostate cancer patients. Those diagnosed in summer or fall, when serum 25(OH)D levels were highest, had a lower risk of death. There was no difference in prognosis between those living in northern or southern regions of Norway; the authors suggested that dietary intake of fatty fish and cod liver, which are commonly consumed in northern Norway, may explain this finding. This study also suggests that higher vitamin D levels during cancer treatment may improve treatment effects.<sup>49</sup> Further research on the relationships between vitamin D and cancer is warranted among aboriginal Arctic populations.

## Diabetes

Alaska Native people have the highest rate of increase in diabetes of any people in North America,<sup>50</sup> and the prevalence of diabetes among aboriginal people in northern Canada is also increasing.<sup>17,19</sup> Vitamin D is believed to play a role in glucose intolerance, type 2 diabetes, and metabolic syndrome due to its effects on insulin secretion and sensitivity,<sup>51,52</sup> and it may also be an environmental factor in the development of type 1, or juvenile, diabetes.<sup>53</sup> As diabetes rates continue to rise in Arctic populations, the public health implications of vitamin D status are becoming increasingly significant.

The incidence of type 2 diabetes was associated with low serum vitamin D status in Finland (latitude >60° N) in a pooled analysis of two cohorts (in which similar results were found previously).<sup>52</sup> Men with the highest serum vitamin D concentrations (range, 54–148 nmol/L; mean, 69.1 nmol/L) had an 82% lower risk than those with the lowest concentrations (range, 9–29 nmol/L; mean, 22.3 nmol/L) after adjustment for BMI, physical activity, smoking, and education. Vitamin D insufficiency [serum 25(OH)D < 50 nmol/L or 20 ng/mL] was also reported in the winter among a small cohort with type 2 diabetes in Scotland at approximately 56° N.<sup>54</sup>

Results of randomized controlled trials of vitamin D supplementation related to diabetes, including some trials conducted at higher latitudes, have varied.<sup>55</sup> However, it has been suggested that promoting higher intakes of both vitamin D and calcium may be an inexpensive intervention for prevention of type 2 diabetes.<sup>56</sup>

A birth-cohort study in northern Finland (latitude 65–68° N) showed that regular vitamin D supplementation of  $\geq 2,000$  IU/day (or 50  $\mu\text{g/day}$ ) in infancy was associated with a reduced risk of developing type 1 dia-

betes.<sup>57</sup> Stene and Joner<sup>58</sup> also observed a reduced risk of type 1 diabetes in Norway (latitude 58–71° N) in children who were supplemented with cod liver oil (approximately 400 IU/day or 10  $\mu\text{g}$  at least 5 times per week) during the first year of life. In a previous study, the same authors observed a reduced risk of type 1 diabetes in offspring when mothers used cod liver oil during pregnancy, but no significant benefit was found with the use of other vitamin D supplements in this study.<sup>59</sup> The authors suggested the effects could be attributed to the fatty acids in cod liver oil, which are also found in other marine sources of vitamin D consumed by aboriginal Arctic people (such as fatty fish, seal, and whale blubber). Additionally, the authors suggested the bioavailability of vitamin D may be better in cod liver oil than in other supplements; however, Holvik et al.<sup>60</sup> reported no difference in the bioavailability of vitamin D between fish oil capsules and a multivitamin tablet containing the same dose of cholecalciferol.

## Infectious disease

Antimicrobial drug resistance, the re-emergence of tuberculosis, and the emergence of HIV and other viruses in Arctic communities has caused increased concern among governments and medical and public health officials.<sup>61</sup> Besides crowded housing, the cold climate, overuse and/or lack of antimicrobial drugs in the Arctic,<sup>61</sup> vitamin D status may also be a determinant of some infectious diseases. Vitamin D deficiency has been associated with increased rates of infection, including respiratory infections, influenza, and active tuberculosis, as reviewed by Gombart.<sup>5</sup> Discussion of the mechanisms by which vitamin D is involved in immunity is beyond the scope of this review.

In 2006, the highest rates of tuberculosis in Canada were reported in Nunavut (155.9 cases per 100,000 people). Overall, rates were higher among Canadian-born aboriginal people than among Canadian-born non-aboriginal people and were higher in the North (Yukon, the NWT, and Nunavut) than in the rest of Canada.<sup>62</sup> A recent meta-analysis found that patients with tuberculosis had lower serum 25(OH)D levels than controls matched on age, sex, ethnicity, diet, and location; however, the authors did not control for sunlight exposure and smoking.<sup>63</sup> Vitamin D, cod liver oil, and sunlight were used to treat patients with tuberculosis before antibiotics were available; although current studies are inconclusive, vitamin D has been suggested as a possible safe, low-cost prophylaxis and supplemental treatment for tuberculosis and other bacterial infections.<sup>64,65</sup> It has also been suggested that higher vitamin D levels may be required for optimal innate immune function,<sup>64</sup> which further brings into question the adequacy of current

recommendations, especially for populations with limited UVB exposure.

### Implications for public health

When sunlight is not sufficient to meet vitamin D needs, ensuring adequate vitamin D intake is paramount. Mandatory vitamin D fortification policies have been established in Canada, Norway, Sweden, and Finland. While food fortification does contribute to improved vitamin D intake and status,<sup>66,67</sup> whether it is sufficient to improve the health status of a population at a high latitude is unclear. For example, vitamin D fortification of milk products and margarine in Finland has been effective in improving vitamin D status and intake, but the high prevalence of suboptimal vitamin D status during the winter remains a concern in this population.<sup>66,67</sup> Expanding the number of foods to be fortified with vitamin D has been suggested in Canada and Finland.<sup>67,68</sup> Further research is needed to establish an adequate serum 25(OH)D level for optimal health outcomes and the amount of fortification needed to achieve this serum level.

In addition to fortification, many researchers and health professionals support the need for oral vitamin D supplementation at northern latitudes.<sup>30,37,67,68</sup> Supplementation is believed to be an inexpensive and well-tolerated intervention and may help prevent expensive medical treatment for deficiency-related problems if the population is agreeable<sup>9,48,69</sup>; however, the optimal dose and frequency are still debated. In Denmark, four strategies were considered to promote increased vitamin D intake among the high-risk segments of the population, and supplementation was found to be the most preferred method to accomplish this.<sup>70</sup> An assessment to determine the optimal method for increasing vitamin D intake among aboriginal Arctic populations is warranted.

Furthermore, many studies have raised concerns that current intake recommendations in many countries are too low to prevent vitamin D deficiency and associated health problems for many population groups. Experts have suggested that recommendations be substantially increased and tailored to specific populations, considering the variety of factors that affect vitamin D status.<sup>69,71–73</sup> As a result, in 2004, the Nordic Nutrition Recommendations (which serve as dietary recommendations for all Nordic countries: Denmark/Greenland, Finland, Norway, Sweden, and Iceland) were revised with increased vitamin D recommendations – from 5 µg/day to 7.5 µg/day – for ages 2–60 years, based on accumulating evidence of significant seasonal variation in vitamin D status.<sup>74</sup> In 2010, the Institute of Medicine of the National Academies also revised the Dietary Reference Intakes (DRIs) for vitamin D (and calcium) in collaboration with US and Canadian governments. The recommendations for vitamin D

increased to 15 µg/day (600 IU) for all individuals 1 to 70 years of age and 20 µg/day (800 IU) for adults <70 years.<sup>25</sup>

These authors and others strongly urge that culturally appropriate nutrition education and intervention programs continue and expand throughout Arctic communities to improve dietary intake and reduce chronic disease rates related to nutrient insufficiency.<sup>14–16,18</sup> Healthy Foods North is an example of a comprehensive nutrition intervention aimed at reducing dietary and lifestyle risk factors for chronic diseases in aboriginal Canadian Arctic populations.<sup>75–77</sup> This program has identified several nutrient deficiencies in Nunavut and the NWT and has shaped nutrition intervention strategies based on these deficiencies.<sup>15,16</sup> This program emphasizes traditional foods, such as fatty fish and marine mammals, to improve vitamin D intake. Although there is a continued need to improve data on contaminants in fish by regions, as well as on vitamin D values in fish (and marine mammals) by region, a recent joint consultation of the Food and Agriculture Organization of the United Nations and the World Health Organization affirmed that fish is an important source of food and nutrition for many cultural groups.<sup>78</sup> This report further affirms that fish consumption is beneficial for reducing cardiovascular disease and enhancing neurodevelopment of fetuses of pregnant women, and it indicates that establishing a healthy diet that includes fish is important, especially among vulnerable populations, such as those in the Arctic, where fish (and marine mammal) consumption is a critical source of vitamin D in winter months.<sup>78</sup>

### CONCLUSION

In summary, aboriginal Arctic populations are among those at highest risk of vitamin D deficiency due to low UVB exposure, inadequate vitamin D intake as a result of decreased consumption of traditional foods, and darker skin pigmentation. Despite limited health research on aboriginal Arctic people, this brief review of current evidence related to populations at high latitudes suggests it is imperative for nutrition, medical, and public health professionals to focus on strategies to maintain adequate vitamin D status in these populations in order to help reduce the risk and economic burden of numerous chronic and infectious diseases.

Continued research is needed to further understand the role of vitamin D in the etiology and treatment of chronic and infectious diseases among aboriginal, national, and global populations at differing latitudes. In light of the known risk factors for Arctic populations, accurate assessment of the extent of vitamin D inadequacy and its health consequences in this area should be a priority. Finally, research that further examines the role and safety of marine products and other traditional foods



within food systems is essential to determine sustainable approaches to improving health in the Arctic. A better understanding of these matters will guide researchers and health professionals in developing appropriate, evidenced-based recommendations and effective interventions for Arctic populations.

## Acknowledgments

The authors thank the members of the Healthy Foods North team for their tireless efforts and their dedication to improving the health of aboriginal Arctic populations.

*Funding.* This work was supported by the American Diabetes Association Clinical Research award (1-08-CR-57).

*Declaration of interest.* The authors have no relevant interests to declare.

## REFERENCES

1. Holick MF. Vitamin D deficiency. *N Engl J Med.* 2007;357:266–281.
2. Calvo MS, Whiting SJ, Barton CN. Vitamin D intake: a global perspective of current status. *J Nutr.* 2005;135:310–316.
3. Bandeira F, Griz L, Dreyer P, Eufrazino C, Bandeira C, Freese E. Vitamin D deficiency: a global perspective. *Arq Bras Endocrinol Metabo.* 2006;50:640–646.
4. Kulie T, Groff A, Redmer J, Hounshell J, Schragar S. Vitamin D: an evidence-based review. *J Am Board Fam Med.* 2009;22:698–706.
5. Gombart A. The vitamin D-antimicrobial peptide pathway and its role in protection against infection. *Future Microbiol.* 2009;4:1151–1165.
6. Whiting SJ, Calvo MS. Dietary recommendations for vitamin D: a critical need for functional end points to establish an estimated average requirement. *J Nutr.* 2005;135:304–309.
7. Hanley DA, Davison KS. Vitamin D insufficiency in North America. *J Nutr.* 2005;135:332–337.
8. Holick MF. Vitamin D and sunlight: strategies for cancer prevention and other health benefits. *Clin J Am Soc Nephrol.* 2008;3:1548–1554.
9. Bischoff-Ferrari HA, Giovannucci E, Willett WC, Dietrich T, Dawson-Hughes B. Estimation of optimal serum concentrations of 25-hydroxyvitamin D for multiple health outcomes. *Am J Clin Nutr.* 2006;84:18–28. [Erratum, *Am J Clin Nutr.* 2006;84:1253.]
10. Garland CF, Gorham ED, Mohr SB, Garland FC. Vitamin D for cancer prevention: global perspective. *Ann Epidemiol.* 2009;19:468–483.
11. Webb AR, Kline L, Holick MF. Influence of season and latitude on the cutaneous synthesis of vitamin D<sub>3</sub>: exposure to winter sunlight in Boston and Edmonton will not promote vitamin D<sub>3</sub> synthesis in human skin. *J Clin Endocrinol Metab.* 1988;67:373–378.
12. Young OR, Elnarsson N. *Arctic Human Development Report.* 2004; Available at: [http://hdr.undp.org/en/reports/regionalreports/other/arctic\\_2004\\_en.pdf](http://hdr.undp.org/en/reports/regionalreports/other/arctic_2004_en.pdf). Accessed 16 April 2010.
13. Friberg JT, Melbye M. Cancer patterns in Inuit populations. *Lancet Oncol.* 2008;9:892–900.
14. Receveur O, Boulay M, Kuhnlein HV. Decreasing traditional food use affects diet quality for adult Dene/Metis in 16 communities of the Canadian Northwest Territories. *J Nutr.* 1997;127:2179–2186.
15. Sharma S, De Roose E, Cao X, Pokiak A, Gittelsohn J, Corriveau A. Dietary intake in a population undergoing a rapid transition in diet and lifestyle: the Inuvialuit in the Northwest Territories of Arctic Canada. *Can J Public Health.* 2009;100:442–448.
16. Sharma S, Cao X, Roache C, Buchan A, Reid R, Gittelsohn J. Assessing dietary intake in a population undergoing a rapid transition in diet and lifestyle: the Arctic Inuit in Nunavut, Canada. *Br J Nutr.* 2010;103:749–759.
17. Bjerregaard P, Young TK, Dewailly E, Ebbesson SO. Indigenous health in the Arctic: an overview of the circumpolar Inuit population. *Scand J Public Health.* 2004;32:390–395.
18. Kuhnlein HV, Receveur O, Soueida R, Egeland GM. Arctic indigenous peoples experience the nutrition transition with changing dietary patterns and obesity. *J Nutr.* 2004;134:1447–1453.
19. Lix LM, Bruce S, Sarkar J, Young TK. Risk factors and chronic conditions among aboriginal and non-aboriginal populations. Statistics Canada, catalogue no. 82-003-XPE. Health Rep. 2009;20:1–9.
20. Webb AR. Who, what, where and when—influences on cutaneous vitamin D synthesis. *Prog Biophys Mol Biol.* 2006;92:17–25.
21. Dowdy JC, Sayre RM, Holick MF. Holick's rule and vitamin D from sunlight. *J Steroid Biochem Mol Biol.* 2010;121:328–330.
22. Kull M Jr, Kallikorm R, Tamm A, Lember M. Seasonal variance of 25-(OH) vitamin D in the general population of Estonia, a Northern European country. *BMC Public Health.* 2009;9:22–29.
23. Macdonald HM, Mavroei A, Barr RJ, Black AJ, Fraser WD, Reid DX. Vitamin D status in postmenopausal women living at higher latitudes in the UK in relation to bone health, overweight, sunlight exposure and dietary vitamin D. *Bone.* 2008;42:996–1003.
24. Brustad M, Alsaker E, Engelsen O, Aksnes L, Lund E. Vitamin D status of middle-aged women at 65–71 degrees N in relation to dietary intake and exposure to ultraviolet radiation. *Public Health Nutr.* 2004;7:327–335.
25. Institute of Medicine, Food and Nutrition Board. *Dietary Reference Intakes for Calcium and Vitamin D.* Washington, DC: National Academy Press; 2010.
26. Pakseresht M, Sharma S. Validation of a quantitative food frequency questionnaire for Inuit population in Nunavut, Canada. *J Hum Nutr Diet.* 2010;23(Suppl 1):S67–S74.
27. Pakseresht M, Sharma S. Validation of a culturally appropriate quantitative food frequency questionnaire for Inuvialuit population in the Northwest Territories, Canada. *J Hum Nutr Diet.* 2010;23(Suppl 1):S75–S82.
28. Hopping BN, Mead E, Erber E, Sheehy T, Roache C, Sharma S. Dietary adequacy of Inuit in the Canadian Arctic. *J Hum Nutr Diet.* 2010;23(Suppl 1):S27–S34.
29. Erber E, Hopping BN, Beck L, Sheehy T, De Roose E, Sharma S. Assessment of dietary adequacy in a remote Inuvialuit population. *J Hum Nutr Diet.* 2010;23(Suppl 1):S35–S42.
30. Weiler HA, Leslie WD, Krahn J, Steiman PW, Metge CJ. Canadian aboriginal women have a higher prevalence of vitamin

- D deficiency than non-aboriginal women despite similar dietary vitamin D intakes. *J Nutr.* 2007;137:461–465.
31. Kuhnlein HV, Receveur O. Local cultural animal food contributes high levels of nutrients for Arctic Canadian indigenous adults and children. *J Nutr.* 2007;137:1110–1114.
  32. Rejnmark L, Jørgensen ME, Pedersen MB, et al. Vitamin D insufficiency in Greenlanders on a westernized fare: ethnic differences in calcitropic hormones between Greenlanders and Danes. *Calcif Tissue Int.* 2004;74:255–263.
  33. Dalgård C, Petersen MS, Schmedes AV, Brandslund I, Weihe P, Grandjean P. High latitude and marine diet: vitamin D status in elderly Faroese. *Br J Nutr.* 2010;104:914–918.
  34. Rajakumar K. Vitamin D, cod-liver oil, sunlight, and rickets: a historical perspective. *Pediatrics.* 2003;112:132–135.
  35. Weisberg P, Scanlon KS, Li R, Cogswell ME. Nutritional rickets among children in the United States: review of cases reported between 1986 and 2003. *Am J Clin Nutr.* 2004;80(Suppl 6):S1697–S1705.
  36. Ward LM, Gaboury I, Ladhani M, Zlotkin S. Vitamin D-deficiency rickets among children in Canada. *CMAJ.* 2007;177:161–166.
  37. Canadian Paediatric Association. Position statement: FNIM 2007-01. Vitamin D supplementation: recommendations for Canadian mothers and infants. *Paediatr Child Health.* 2007;12:583–589.
  38. Leslie WD, Derksen S, Metge C, et al. Fracture risk among First Nations people: a retrospective matched cohort study. *CMAJ.* 2004;171:869–873.
  39. Lamberg-Allardt CJ, Outila TA, Kärkkäinen MU, Rita HJ, Valsta LM. Vitamin D deficiency and bone health in healthy adults in Finland: could this be a concern in other parts of Europe? *J Bone Miner Res.* 2001;16:2066–2073.
  40. Meier C, Woitge HW, Witte K, Lemmer B, Seibel MJ. Supplementation with oral vitamin D3 and calcium during winter prevents seasonal bone loss: a randomized controlled open-label prospective trial. *J Bone Miner Res.* 2004;19:1221–1230.
  41. Compston J. Clinical and therapeutic aspects of osteoporosis. *Eur J Radiol.* 2009;71:388–391.
  42. Lanier AP, Day GE, Kelly JJ, Provost E. Disparities in cancer mortality among Alaska Native people, 1994–2003. *Alaska Med.* 2008;49:120–125.
  43. Apperly FL. The relation of solar radiation to cancer mortality in North America. *Cancer Res.* 1941;1:191–195.
  44. Garland CF, Garland FC. Do sunlight and vitamin D reduce the likelihood of colon cancer? *Int J Epidemiol.* 1980;9:227–237.
  45. Grant WB, Mohr SB. Ecological studies of ultraviolet B, vitamin D and cancer since 2000. *Ann Epidemiol.* 2009;19:446–454.
  46. Mohr SB, Garland CF, Gorham ED, Grant WB, Garland FC. Relationship between low ultraviolet B irradiance and higher breast cancer risk in 107 countries. *Breast J.* 2008;14:255–260.
  47. Mohr SB, Garland CF, Gorham ED, Grant WB, Garland FC. Could ultraviolet B irradiance and vitamin D be associated with lower incidence rates of lung cancer? *J Epidemiol.* 2008;62:69–74.
  48. Garland CF, Garland FC, Gorham E, et al. The role of vitamin D in cancer prevention. *Am J Public Health.* 2006;96:252–261.
  49. Robsahm TE, Tretli S, Dahlback A, Moan J. Vitamin D3 from sunlight may improve the prognosis of breast-, colon- and prostate cancer (Norway). *Cancer Causes Control.* 2004;15:149–158.
  50. Naylor JL, Schraer CD, Mayer AM, Lanier AP, Treat CA, Murphy NJ. Diabetes among Alaska Natives: a review. *Int J Circumpolar Health.* 2003;62:363–387.
  51. Chiu KC, Chu A, Go VL, Saad MF. Hypovitaminosis D is associated with insulin resistance and beta cell dysfunction. *Am J Clin Nutr.* 2004;79:820–825.
  52. Knekt P, Laaksonen M, Mattila C, et al. Serum vitamin D and subsequent occurrence of type 2 diabetes. *Epidemiology.* 2008;19:666–671.
  53. Cantorna MT. Vitamin D and autoimmunity: is vitamin D status an environmental factor affecting autoimmune disease prevalence? *Proc Soc Exp Biol Med.* 2000;223:230–233.
  54. Sugden JA, Davies JI, Witham MD, Morris AD, Struthers AD. Vitamin D improves endothelial function in patients with Type 2 diabetes mellitus and low vitamin D levels. *Diabet Med.* 2008;25:320–325.
  55. Pittas AG, Dawson-Hughes B. Vitamin D and diabetes. *J Steroid Biochem Mol Biol.* 2010;121:425–429.
  56. Pittas AG, Dawson-Hughes B, Li T, et al. Vitamin D and calcium intake in relation to type 2 diabetes in women. *Diabetes Care.* 2006;29:650–656.
  57. Hyppönen E, Läärä E, Reunanen A, Järvelin MR, Virtanen SM. Intake of vitamin D and risk of type 1 diabetes: a birth-cohort study. *Lancet.* 2001;358:1500–1503.
  58. Stene LC, Joner G, Norwegian Childhood Diabetes Study Group. Use of cod liver oil during the first year of life is associated with lower risk of childhood-onset type 1 diabetes: a large, population-based, case-control study. *Am J Clin Nutr.* 2003;78:1128–1134.
  59. Stene LC, Ulriksen J, Magnus P, Joner G. Use of cod liver oil during pregnancy associated with lower risk of type I diabetes in the offspring. *Diabetologia.* 2000;43:1093–1098.
  60. Holvik K, Madar AA, Meyer HE, Lofthus CM, Stene LC. A randomised comparison of increase in serum 25-hydroxyvitamin D concentration after 4 weeks of daily oral intake of 10 microg cholecalciferol from multivitamin tablets or fish oil capsules in healthy young adults. *Br J Nutr.* 2007;98:620–625.
  61. Parkinson AJ, Bruce MG, Zulz T. International Circumpolar Surveillance, an Arctic network for the surveillance of infectious diseases. *Emerg Infect Dis.* 2008;14:18–24.
  62. Public Health Agency of Canada. *Tuberculosis in Canada 2006 Pre-Release.* 2006; Available at: <http://www.phac-aspc.gc.ca/publicat/2007/tbcanpre06/>. Accessed 5 May 2010.
  63. Nnoaham KE, Clarke A. Low serum vitamin D levels and tuberculosis: a systematic review and meta-analysis. *Int J Epidemiol.* 2008;37:113–119.
  64. Zasloff M. Fighting infections with vitamin D. *Nat Med.* 2006;12:388–390.
  65. Wejse C, Gomes VF, Rabna P, et al. Vitamin D as supplementary treatment for tuberculosis: a double-blind, randomized, placebo-controlled trial. *Am J Respir Crit Care Med.* 2009;179:843–850.
  66. Välimäki VV, Löyttyneimi E, Välimäki MJ. Vitamin D fortification of milk products does not resolve hypovitaminosis D in young Finnish men. *Eur J Clin Nutr.* 2007;61:493–497.
  67. Piirainen T, Laitinen K, Isolauri E. Impact of national fortification of fluid milks and margarines with vitamin D on dietary intake and serum 25-hydroxyvitamin D concentration in 4-year-old children. *Eur J Clin Nutr.* 2007;61:123–128.
  68. Vatanparast H, Calvo MS, Green TJ, Whiting SJ. Despite mandatory fortification of staple foods, vitamin D intakes of Canadian children and adults are inadequate. *J Steroid Biochem Mol Biol.* 2010;121:301–303.

69. Vieth R, Bischoff-Ferrari H, Boucher BJ, et al. The urgent need to recommend an intake of vitamin D that is effective. *Am J Clin Nutr.* 2007;85:649–650.
70. Rasmussen LB, Hansen GL, Hansen E, et al. Vitamin D: should the supply in the Danish population be increased? *Int J Food Sci Nutr.* 2000;51:209–215.
71. Hollis BW, Wagner CL. Assessment of dietary vitamin D requirements during pregnancy and lactation. *Am J Clin Nutr.* 2004;79:717–726.
72. Weaver CM, Fleet JC. Vitamin D requirements: current and future. *Am J Clin Nutr.* 2004;80(Suppl 6):S1735–S1739.
73. Cashman KD, Hill TR, Lucey AJ, et al. Estimation of the dietary requirement for vitamin D in healthy adults. *Am J Clin Nutr.* 2008;88:1535–1542.
74. Pedersen JI. Vitamin D requirement and setting recommendation levels – current Nordic view. *Nutr Rev.* 2008;66(Suppl 2):S165–S169.
75. Gittelsohn J, Roache C, Kratzmann M, Reid R, Ogina J, Sharma S. Participatory research for chronic disease prevention in Inuit communities. *Am J Health Behav.* 2010;34:453–464.
76. Sharma S. Assessing diet and lifestyle in the Canadian Arctic Inuit and Inuvialuit to inform a nutrition and physical activity intervention programme. *J Hum Nutr Diet.* 2010;23(Suppl 1):S5–S17.
77. Sharma S, Gittelsohn J, Rosol R, Beck L. Addressing the public health burden caused by the nutrition transition through the Healthy Foods North nutrition and lifestyle intervention programme. *J Hum Nutr Diet.* 2010;23(Suppl 1):S120–S127.
78. World Health Organization. *Joint FAO/WHO Expert Consultation on the Risks and Benefits of Fish Consumption; Executive Summary.* 2010; Available at: <http://www.who.int/foodsafety/chem/meetings/jan2010/en/index.html>. Accessed 8 October 2010.
